# Supplementary material for: Molecular interactions between ammonium-based ionic liquids and molecular solvents: current progress and challenges
Source: Royal Society of Chemistry journal article supplement (doi:10.1039/c6cp00199h), 2016-01-01

## **Molecular interactions between ammonium-based ionic liquids and molecular solvents: current progress and challenges**

Varadhi Govinda<sup>a</sup>, Pannuru Venkatesu<sup>a,\*</sup>, Indra Bahadur<sup>b</sup>

<sup>a</sup>*Department of Chemistry, University of Delhi, Delhi – 110 007, India*

<sup>b</sup>*Department of Chemistry, Faculty of Agriculture, Science and Technology, North-West University (Mafikeng Campus), Private Bag X2046, Mmabatho 2735, South Africa*

**Table 1S. Name, abbreviation and chemical structure of ammonium-based ionic liquids:**

**Table 1S. Name, abbreviation and chemical structure of ammonium-based ionic liquids:**

| Name of the ionic liquid | Abbreviation | Structure |
|--------------------------|--------------|-----------|
| Ethylammonium nitrate    | [EAN]        |           |
| N-propylammonium nitrate | [PAN]        |           |
| N-butylammonium nitrate  | [BAN]        |           |
| Methylammonium formate   | [MAF]        |           |
| Ethylammonium formate    | [EAF]        |           |
| Propylammonium formate   | [PAF]        |           |
| Butylammonium formate    | [BAF]        |           |
| Pentylammonium formate   | [PeAF]       |           |
| Ethylammonium propionate | [EAP]        |           |

Ethylammonium butyrate [EAB]

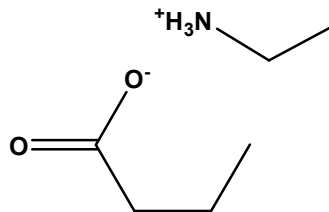

Ethylammonium glycolate [EAG]

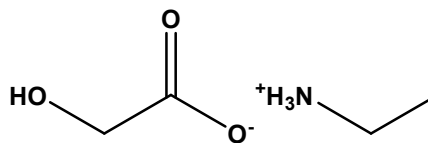

Ethylammonium lactate [EAL]

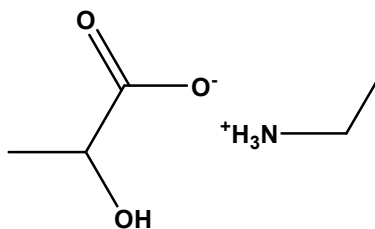

n-ethylammonium acetate [N2A]

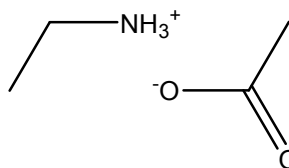

n-propylammonium acetate [N3A]

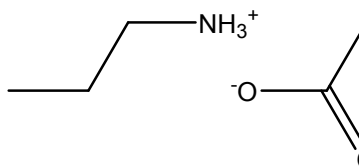

n-butylammonium acetate [N4A]

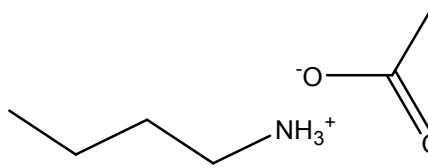

Ethanolammonium nitrate [EOAN]

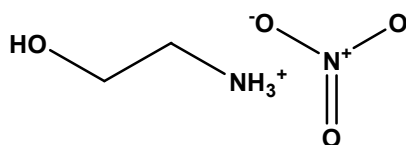

Ethanolammonium formate [EOAF]

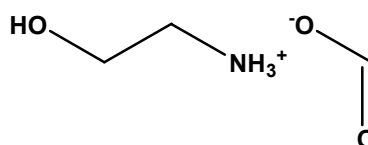

Ethanolammonium acetate [EOAA]

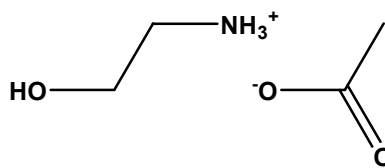

2-propanolammonium formate [2-POAF]

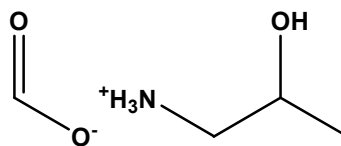

Ethanolammonium lactate [EOAL]

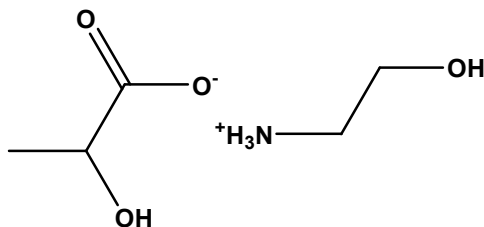

Ethylammonium hydrogen sulfate [EAHS]

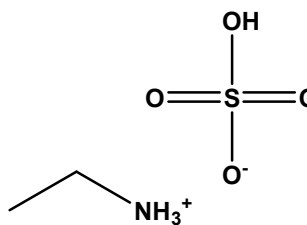

2-methylpropylammonium formate [2-MPAF]

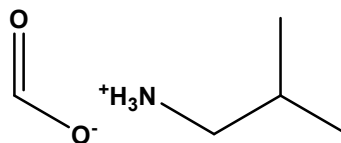

2-methylbutylammonium formate [2-MBAF]

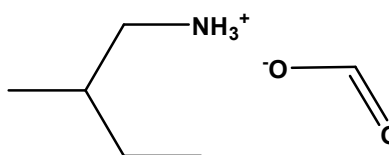

2-methoxyethylammonium nitrate [MEOEAN]

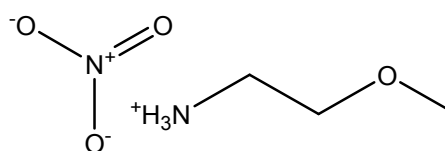

3-hydroxypropylammonium formate [3-HPAF]

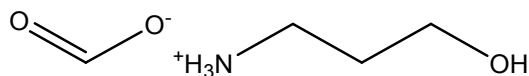

3-hydroxypropylammonium acetate [3-HPAA]

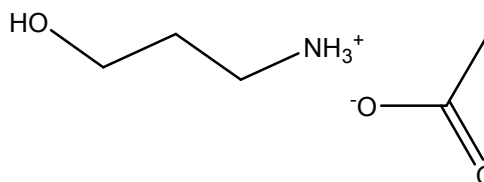

3-hydroxypropylammonium  
trifluoroacetate

[3-HPATFA]

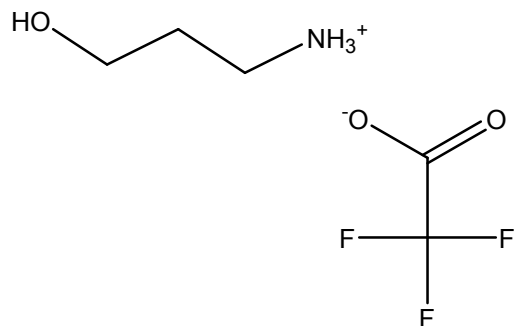

Diethylammonium acetate

[DEAA]

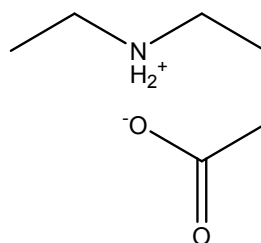

Diethyl ammonium hydrogen  
sulfate

[DEAS]

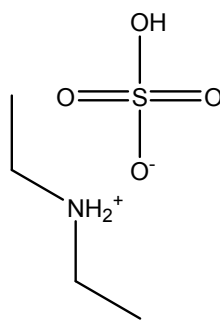

Triethylammonium acetate

[TEAA]

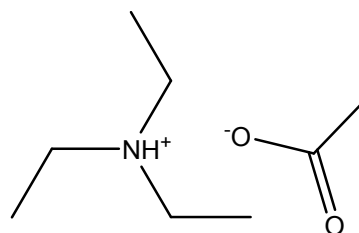

Triethylammonium phosphate

[TEAP]

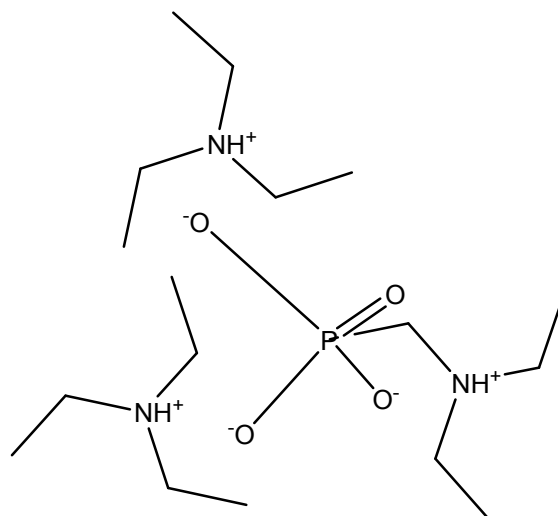

Triethylammonium hydrogen sulfate [TEAS]  
sulfate

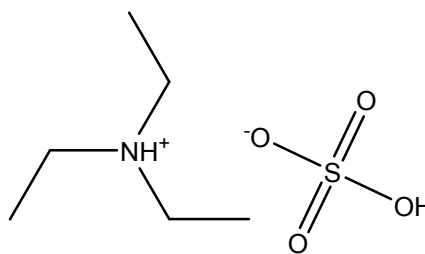

Trimethylammonium acetate [TMAA]

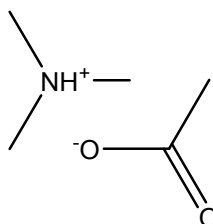

Trimethylammonium phosphate [TMAP]

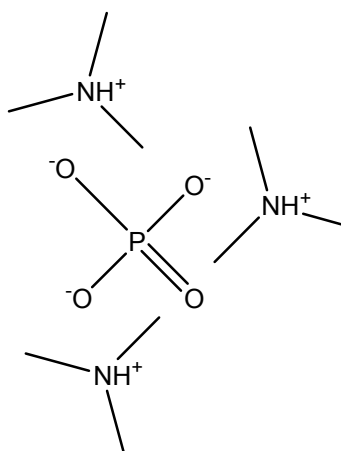

Trimethylammonium hydrogen sulfate [TMAS]  
sulfate

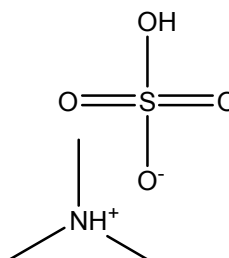

Tetramethylammonium hydroxide [TMAH]

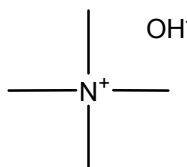

Tetraethylammonium hydroxide [TEAH]

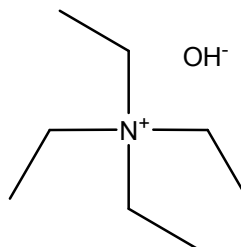

Tetrapropylammonium hydroxide [TPAH]

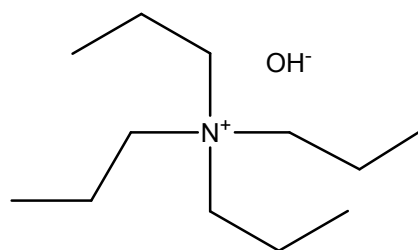

Tetrabutylammonium hydroxide [TBAH]

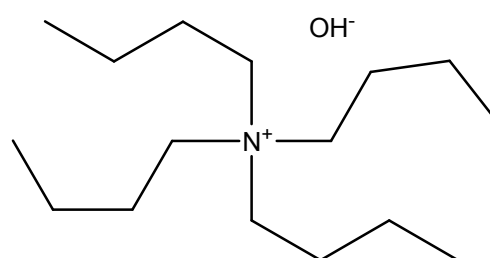

Diallylammonium formate [DAAF]

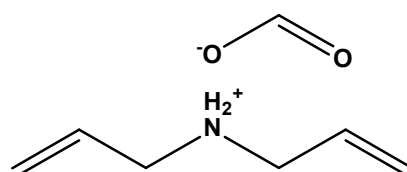

Diallylammonium acetate [DAAA]

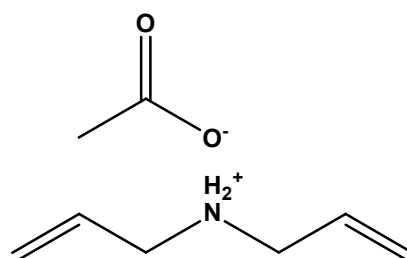

1-hydroxyethylammonium formate [HEAF]

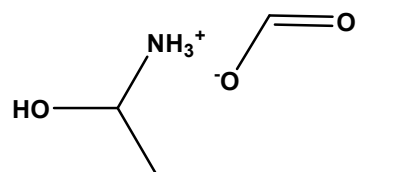

1-hydroxyethylammonium acetate [HEAA]

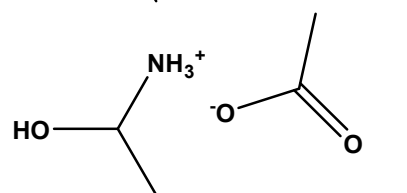

1-hydroxyethylammonium malonate [HEAMal]

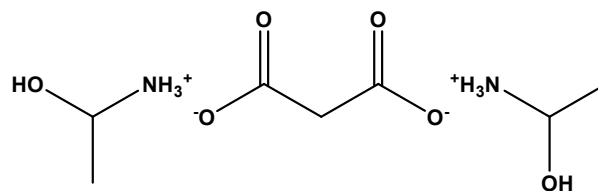

2-hydroxydiethylammonium formate [2-HDEAF]

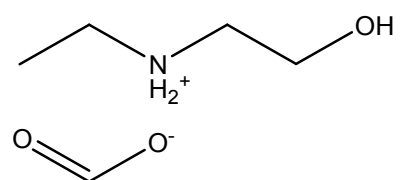

2-hydroxytriethylammonium  
formate [2-HTEAF]

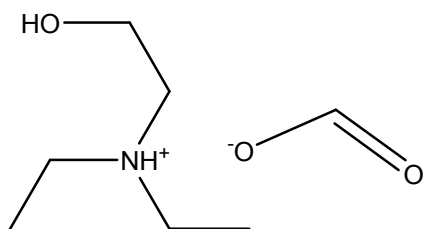

tri-(2-hydroxyethyl) ammonium [THEAA]  
acetate

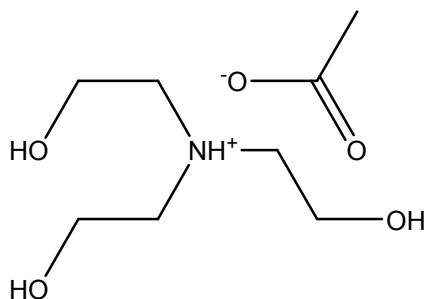

tri-(2-hydroxyethyl) ammonium [THEAL]  
lactate

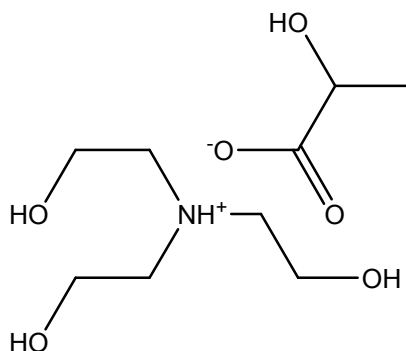

2-(2-hydroxyethoxy) ammonium [2,2-HEOAF]  
formate

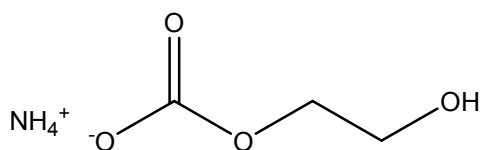

2-(2-hydroxyethoxy) ammonium [2,2-HEOAA]  
acetate

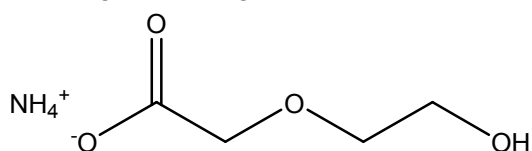

2-(2-hydroxyethoxy)ammonium [2,2-HEOAL]  
lactate

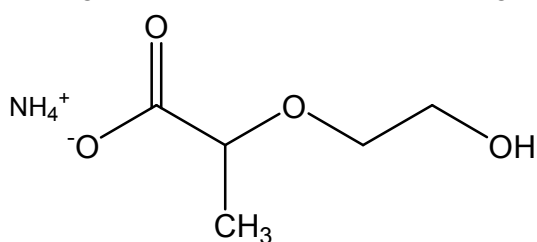

3-hydroxypropylammonium [3-HPAMal]  
malonate

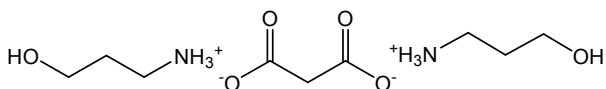

Bis(2-hydroxyethyl)ammonium [BHEAF]  
formate

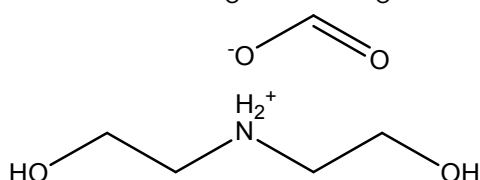



Bis(2-hydroxyethyl)ammonium acetate [2-BHEAA]

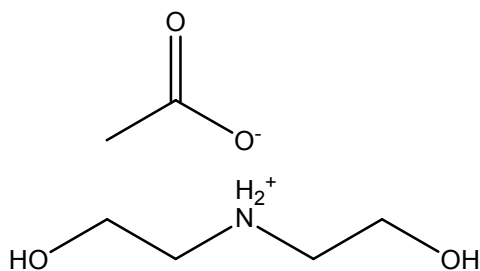

Bis(2-hydroxyethyl) ammonium malonate [DEAMal]

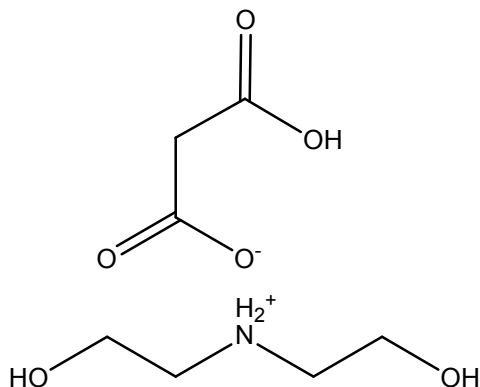

Bis(2-hydroxyethyl)ammonium propionate [2-BHEAP]

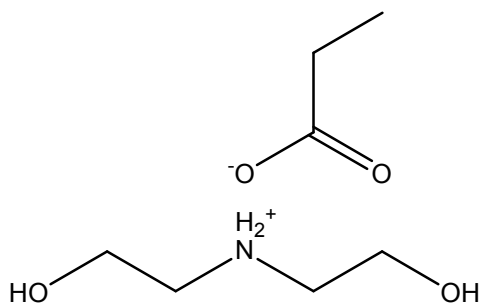

N-Methyl-2-hydroxyethyl ammonium formate [m-2-HEAF]

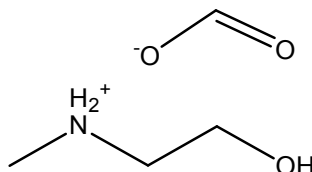

N-Methyl-2-hydroxyethylammonium acetate [m-2-HEAA]

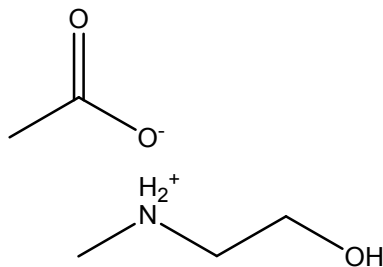

N-methyl-2-hydroxyethylammonium butyrate [m-2-HEAB]

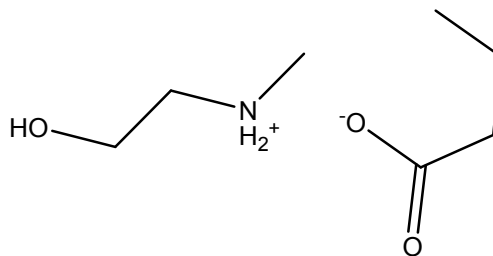

N-Methyl-2-hydroxyethylammonium isobutyrate

[m-2-HEAiB]

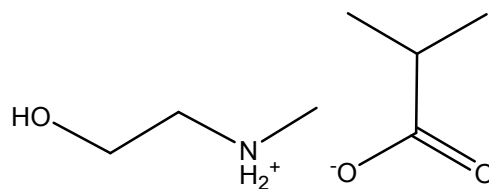

N-Methyl-2-hydroxyethylammonium pentanoate

[m-2-HEAP]

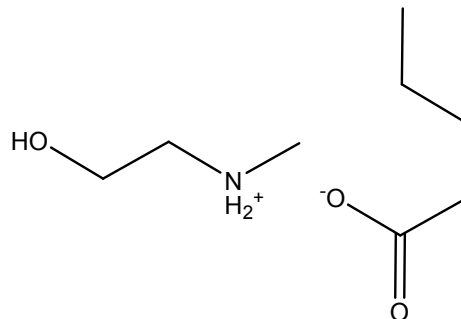

Tris(2-hydroxyethyl)methyl ammonium methylsulfate

[MTEOA][MeOSO<sub>3</sub>]

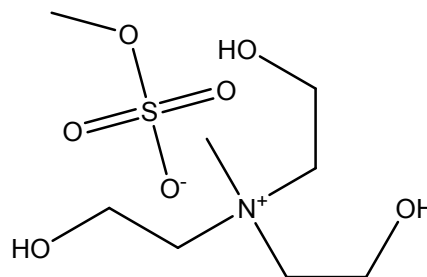

Methyltrioctylammonium bis(trifluoromethylsulfonyl) imide

[MOA]<sup>+</sup>[Tf<sub>2</sub>N]<sup>-</sup>

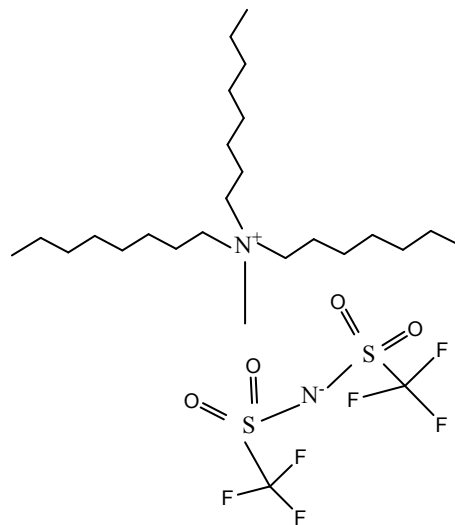

Trimethylbutylammonium  
bis(trifluoromethylsulfonyl) imide

[N<sub>1114</sub>][Tf<sub>2</sub>N]

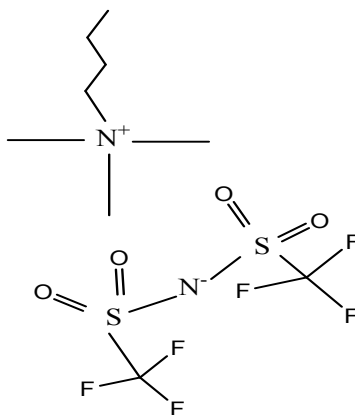

Tributylmethylammonium  
bis(trifluoromethylsulfonyl) imide

[N<sub>4441</sub>][Tf<sub>2</sub>N]

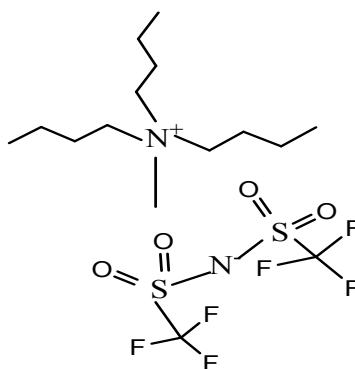

N-hexyl-triethylammonium  
bis(trifluoromethylsulfonyl)imide

[N<sub>6,222</sub>][Tf<sub>2</sub>N]

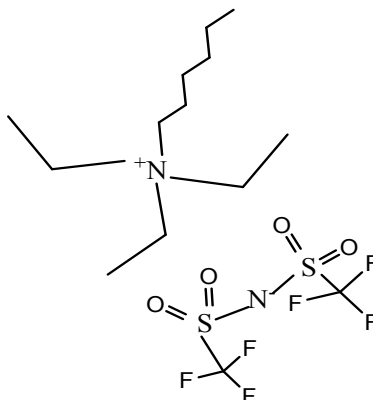

N-heptyl-triethylammonium  
bis(trifluoromethylsulfonyl)imide

[N<sub>7,222</sub>][Tf<sub>2</sub>N]

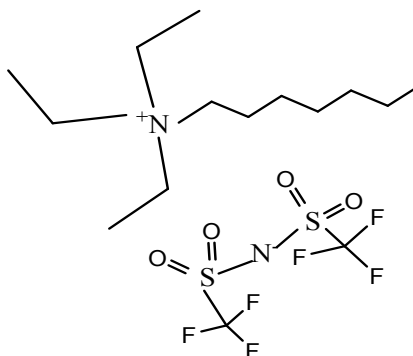

N-octyl-triethylammonium  
bis(trifluoromethylsulfonyl)imide

[N<sub>8,222</sub>][Tf<sub>2</sub>N]

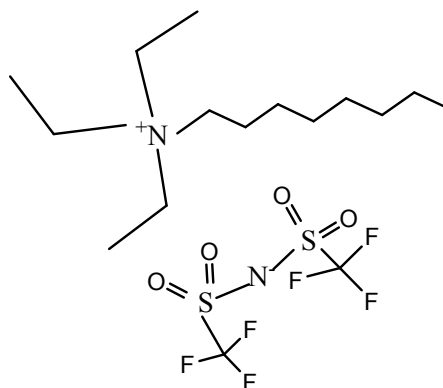

N-docyl-triethylammonium  
bis(trifluoromethylsulfonyl)imide

[N<sub>10,222</sub>][Tf<sub>2</sub>N]

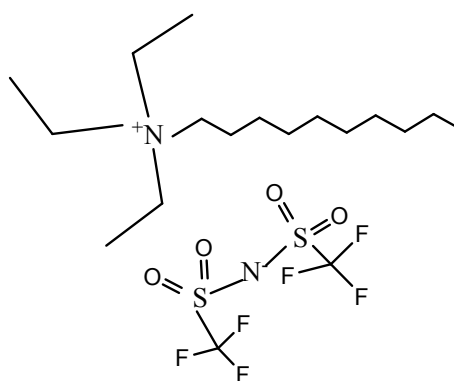

N-dodecyl-triethylammonium  
bis(trifluoromethylsulfonyl)imide

[N<sub>12,222</sub>][Tf<sub>2</sub>N]

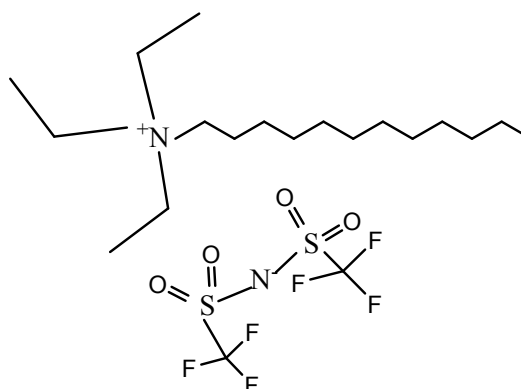

N-tetradecyl-triethylammonium  
bis(trifluoromethylsulfonyl)imide

[N<sub>14,222</sub>][Tf<sub>2</sub>N]

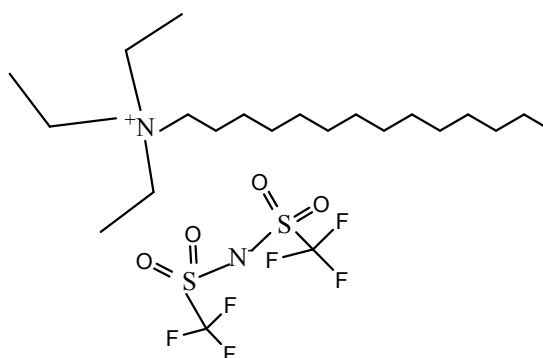

Poly(N,N-dimethyl-N-[2-(methacryloyloxy)ethyl]-N-(2-methoxyethyl)ammonium) bis(fluorosulfonyl)imide

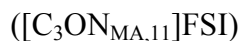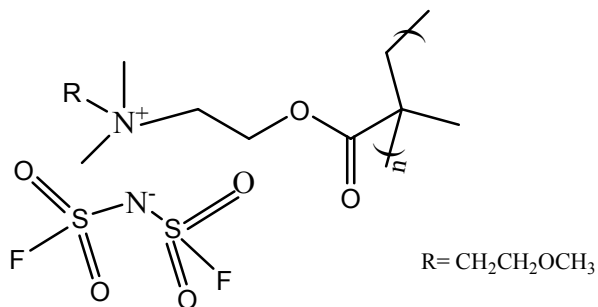

Poly(N,N-dimethyl-N-[2-(methacryloyloxy)ethyl]-N-(2-methoxy)ethylammonium) bis(fluorosulfonyl)imide

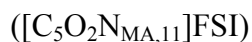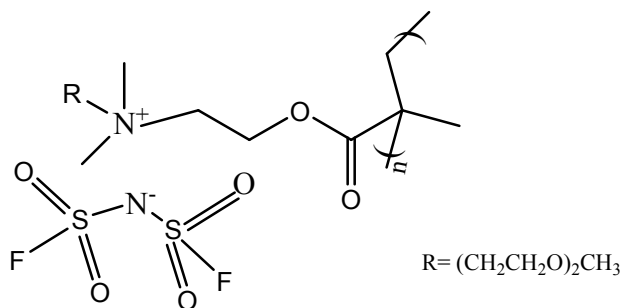

Poly(N,N-dimethyl-N-[2-(methacryloyloxy)ethyl]-N-[2-(2-methoxy)ethoxy]ethyl]ammonium) bis(fluorosulfonyl)imide

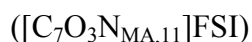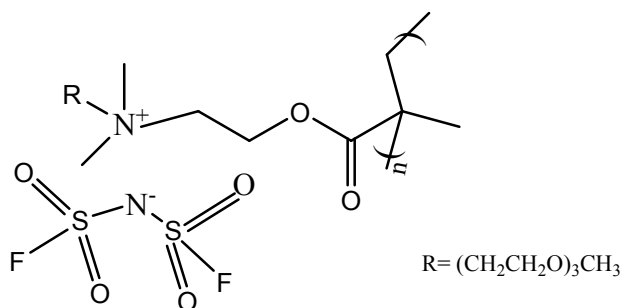

Poly(N,N-dimethyl-N-[2-(methacryloyloxy)ethyl]-N-(2-methoxyethyl)ammonium) bis(trifluorosulfonyl)imide

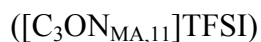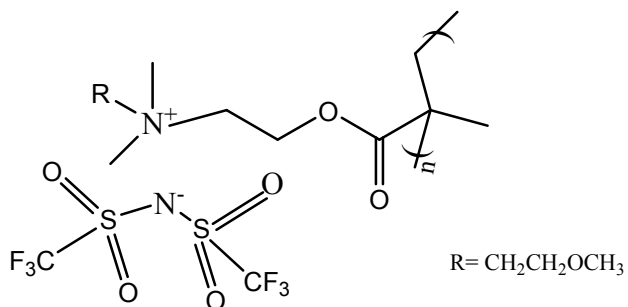

Poly(N,N-dimethyl-N-[2-(methacryloyloxy)ethyl]-N-[2-(2-methoxy)ethyl]ammonium) bis(trifluorosulfonyl)imide

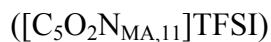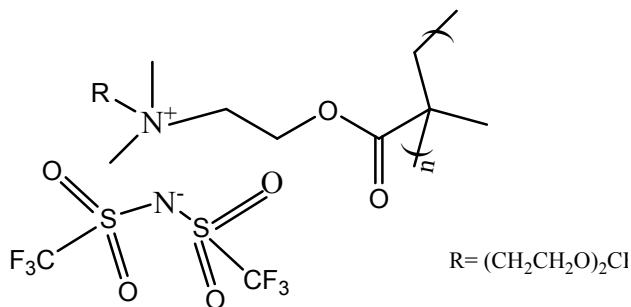

Poly(N,N-dimethyl-N-[2-(methacryloyloxy)ethyl]-N-[2-(2-methoxyethoxy)ethyl]ammonium) bis(trifluorosulfonyl)imide

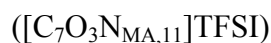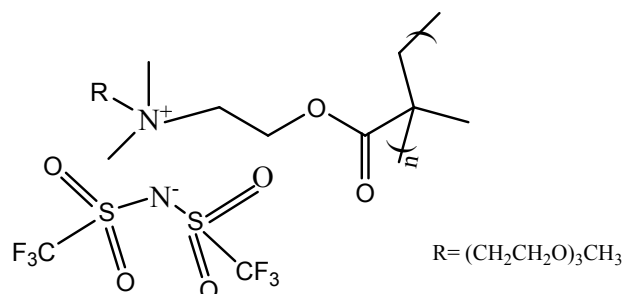

Poly(N-(n-butyl)-N,N-dimethyl-N-[2-(methacryloyloxy)ethyl]ammonium) bis(fluorosulfonyl)imide

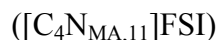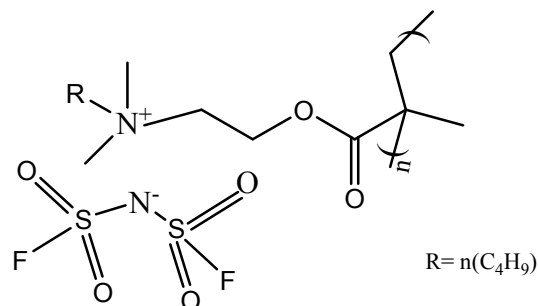

Poly(N-(n-butyl)-N,N-dimethyl-N-[2-(methacryloyloxy)ethyl]ammonium) bis(trifluoromethanesulfonyl)imide

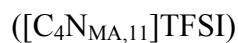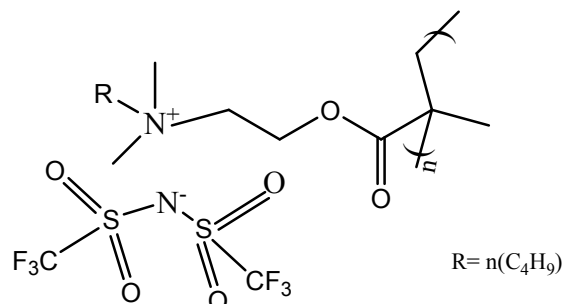

Poly(N,N-dimethyl-N-(n-butyl)-N-[2-(methacryloyloxy)ethyl]-N-(2-methoxyethyl)ammonium) bis(fluorosulfonyl)imide

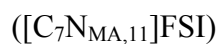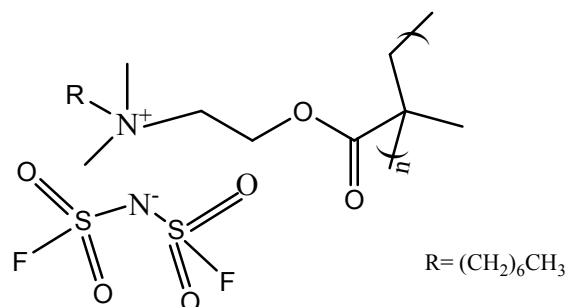

Poly(N,N-dimethyl-N-(n-heptyl)-N-[2-(methacryloyloxy)ethyl]-N-(2-methoxyethyl)ammonium) bis(trifluorosulfonyl)imide

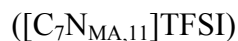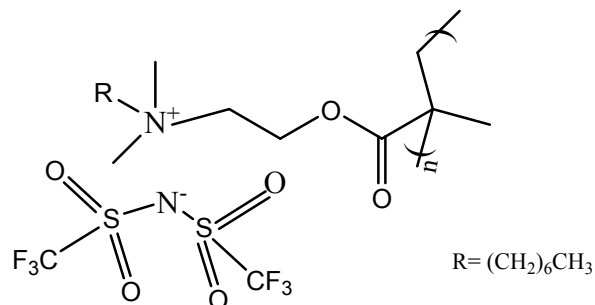

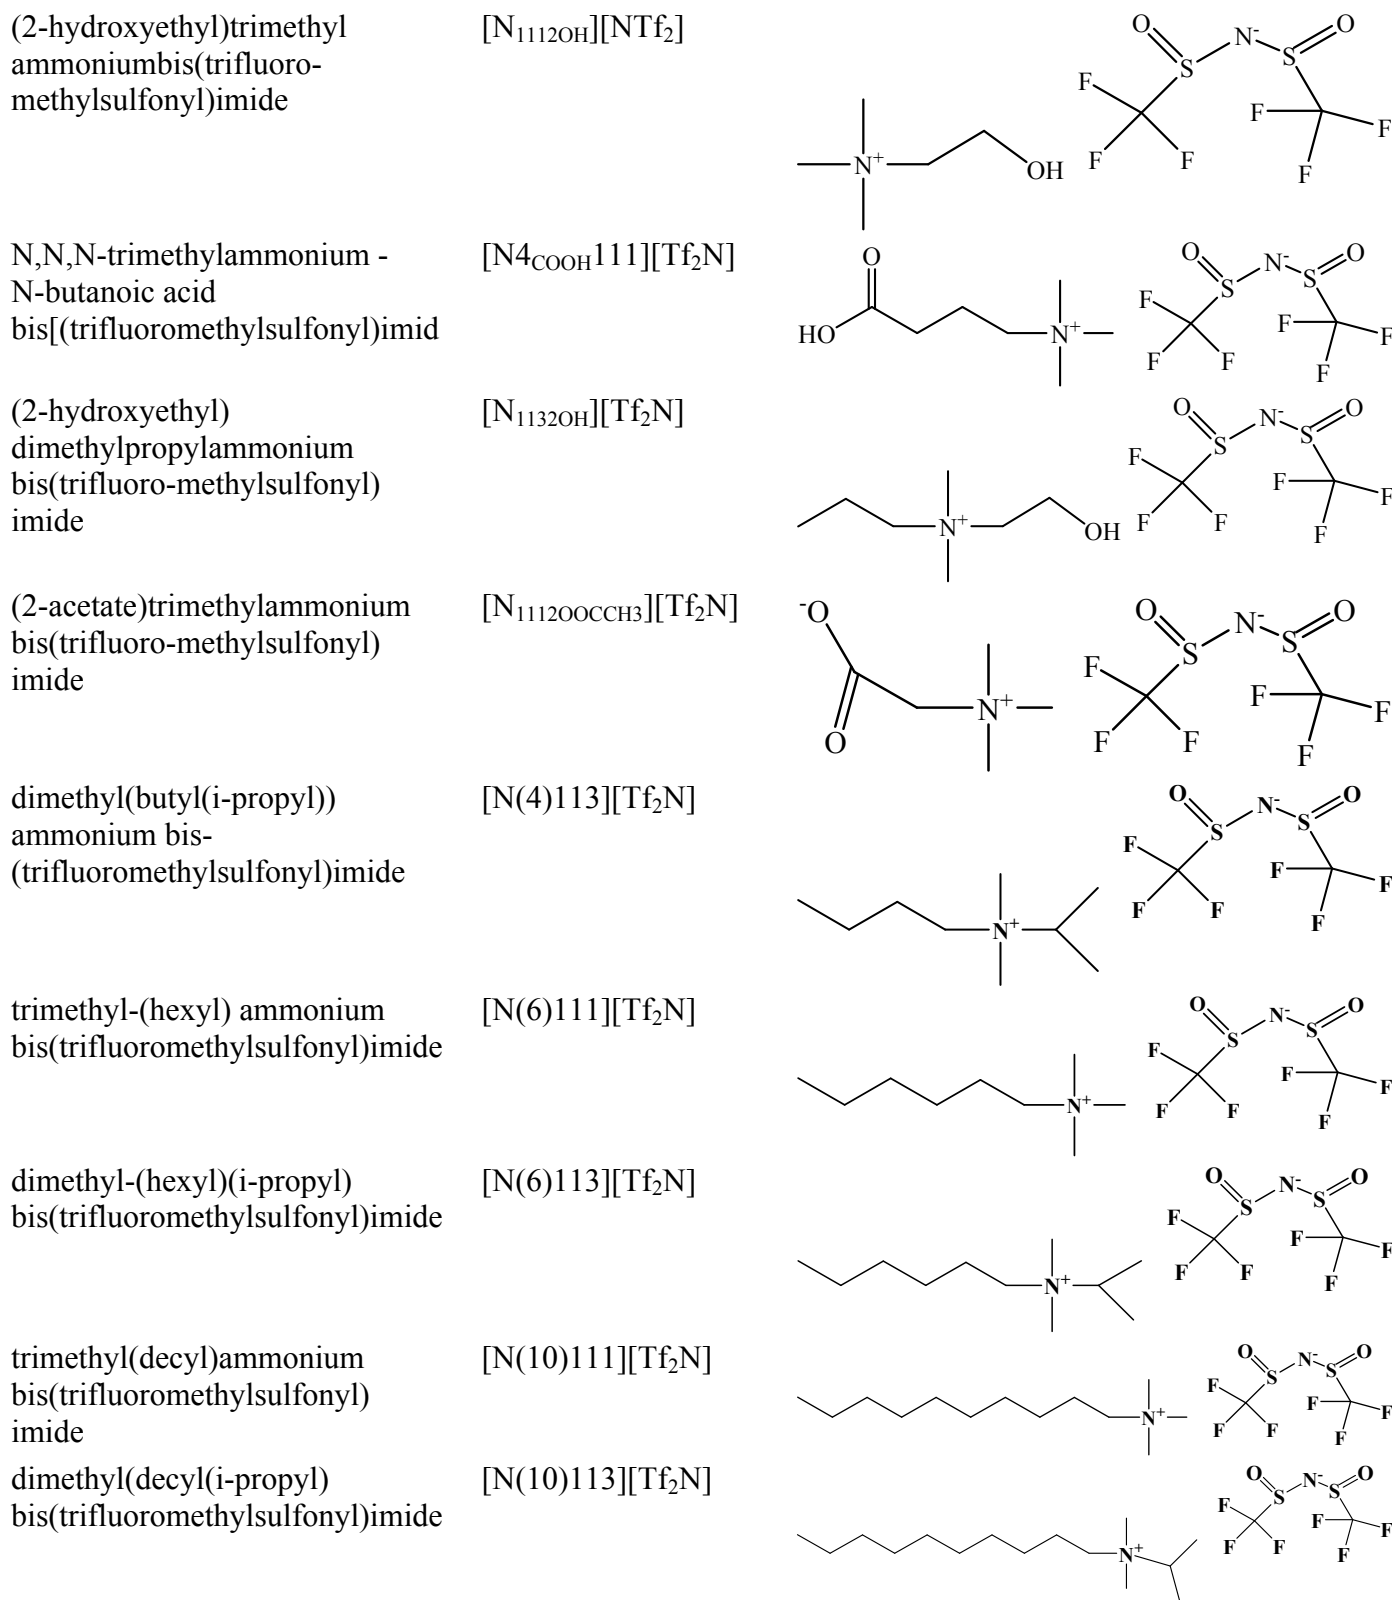

trioctyl(methyl)ammonium  
bis(trifluoromethylsulfonyl) imide

[N(1)888][Tf<sub>2</sub>N]

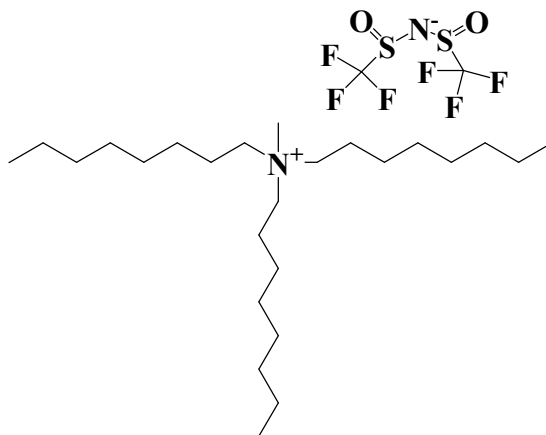

tributylhexylammonium  
bis(trifluoromethylsulfonyl)imide

[N<sub>4,4,4,6</sub>][NTf<sub>2</sub>]

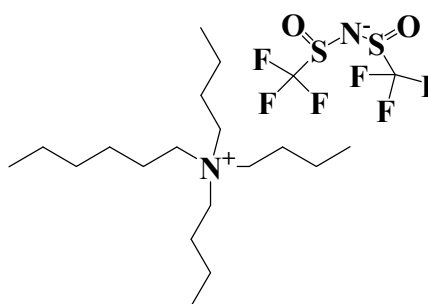

N,N,N,N-tetraethyl  
ammoniumtetrafluoroborate

[N<sub>2222</sub>]BF<sub>4</sub>

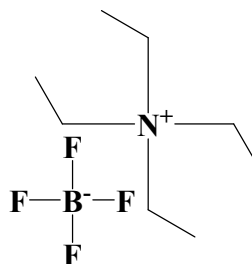

N,N,N,N-tetraethyl  
ammoniumhexafluorophosphate

[N<sub>2222</sub>]PF<sub>6</sub>

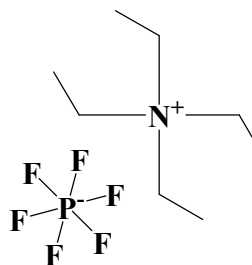

N,N,N,N-tetraethyl  
ammoniumhexafluoroantimonate

[N<sub>2222</sub>]SbF<sub>6</sub>

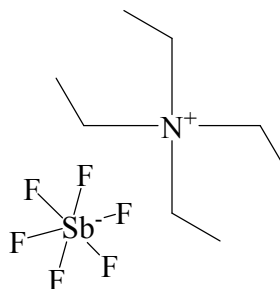



N,N,N-triethylbutyl  
ammoniumtetrafluoroborate

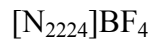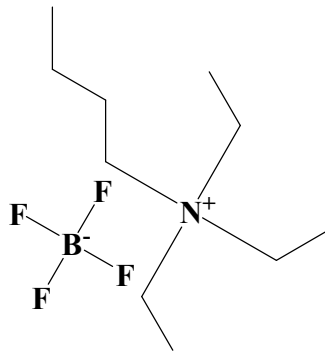

N,N,N-triethylbutyl  
ammoniumhexafluorophosphate

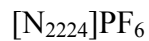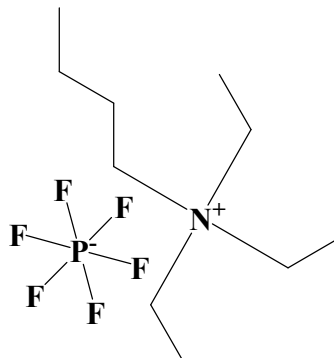

N,N,N-triethylbutyl  
ammoniumhexafluoroantimonate

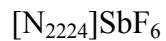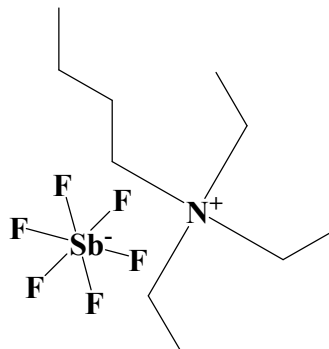

N,N,N-triethylhexyl  
ammoniumtetrafluoroborate

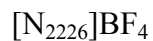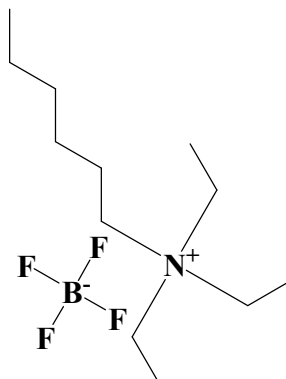

N,N,N-triethylhexyl  
ammoniumhexafluorophosphate

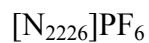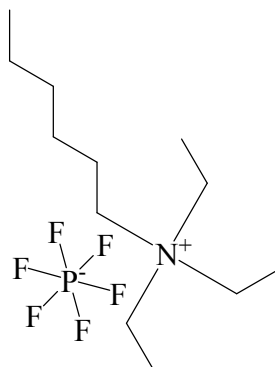

N,N,N-triethylhexyl  
ammoniumhexafluoroantimonate

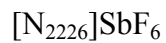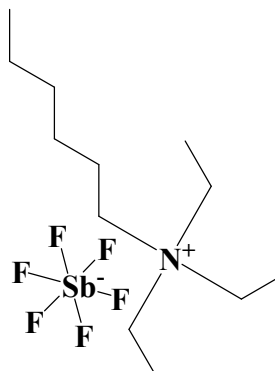

N,N,N-triethyloctyl  
ammoniumtetrafluoroborate

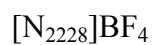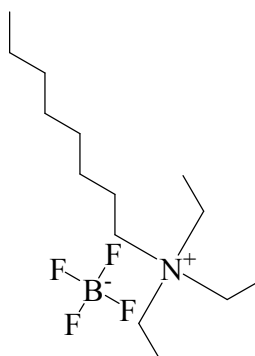

N,N,N-triethyloctyl  
ammoniumhexafluorophosphate

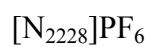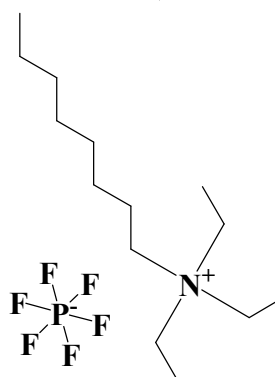

N,N,N-triethyloctyl ammoniumhexafluoroantimonate

[N<sub>2228</sub>][SbF<sub>6</sub>]

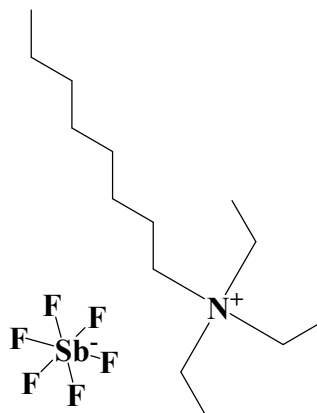

N,N-Diethyl-N-methyl-N-(n-propyl)ammonium bis(2,2,2-trifluoroethoxy sulfonyl)imide

(N<sub>1223</sub>[TFESI])

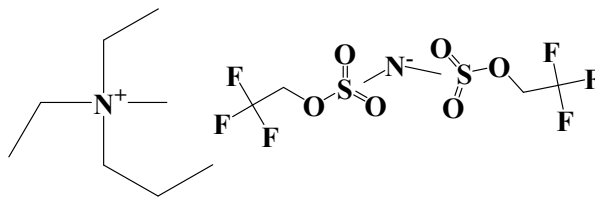

N-(n-Butyl)-N,N-diethyl-N-methylammonium bis(2,2,2-trifluoroethoxy sulfonyl)imide

(N<sub>1224</sub>[TFESI])

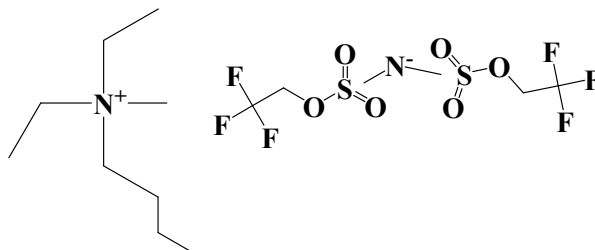

N,N-Diethyl-N-methyl-N-(2-methoxyethyl) ammonium bis(2,2,2-trifluoroethoxysulfonyl)imide

(N<sub>122.102</sub>[TFESI])

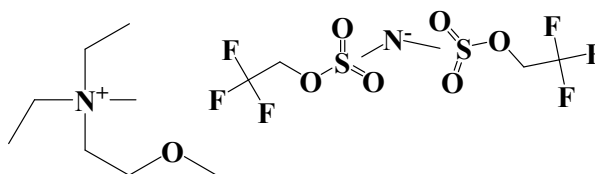

Trialkyl[(1R,2S,5R)-(-)-menthoxymethyl] ammonium bis(trifluoromethanesulfonyl)imides

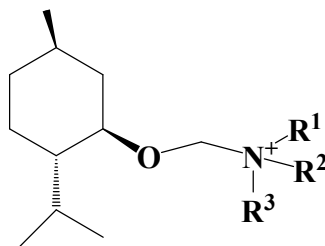

methylethyldipropyl ammonium bis(trifluorosulfonyl)imide

[N<sub>1233</sub>][TFESI]

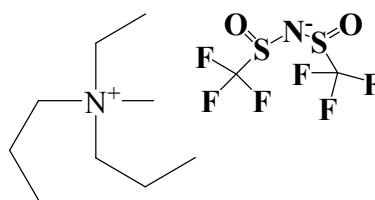

dimethylethylpropyl ammonium bis(trifluorosulfonyl)imide

[N<sub>1123</sub>][TFESI]

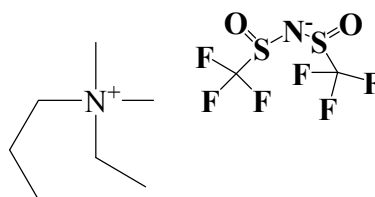

diethylmethylbutyl ammonium  
bis(trifluorosulfonyl)imide

[N<sub>1224</sub>][TFSI]

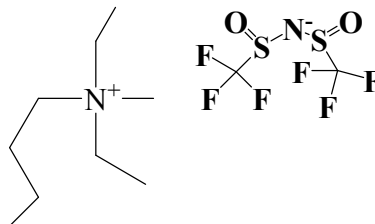

diethylmethyltrifluorobutyl  
ammonium bis(trifluorosulfonyl)  
imide

[N<sub>1224f</sub>][TFSI]

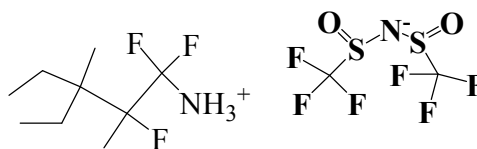

trimethylhexylammonium  
bis(trifluorosulfonyl)imide

[N<sub>1116</sub>][TFSI]

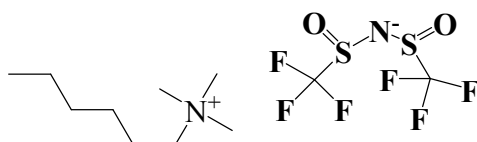

trimethyloctylammonium  
bis(trifluorosulfonyl)imide

[N<sub>1118</sub>][TFSI]

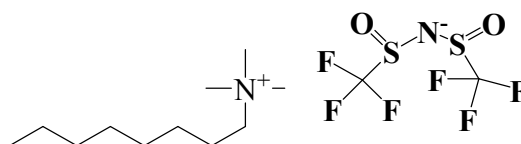

diethylmethyllummonium  
trifluoromethanesulfonate

([N<sub>122</sub>][TfO])

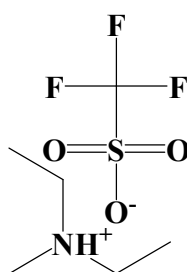

allyldimethylammonium  
trifluoromethanesulfonate

([N<sub>11a</sub>][TfO])

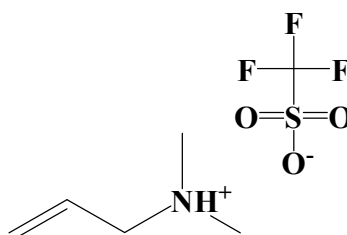

dimethylpropylammonium  
trifluoromethanesulfonate

[N<sub>113</sub>][TfO]

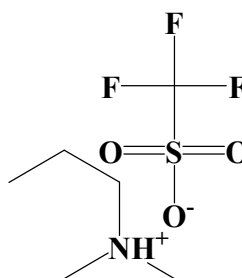

allyldiethylammonium  
trifluoromethanesulfonate

[N22a][TfO]

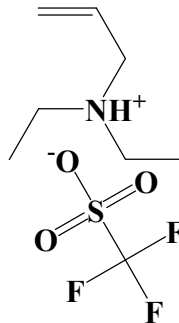

diethylpropylammonium  
trifluoromethanesulfonate

[N223][TfO]

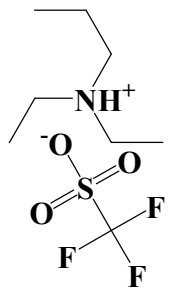

diallylmethylammonium  
trifluoromethanesulfonate

[N1aa][TfO]

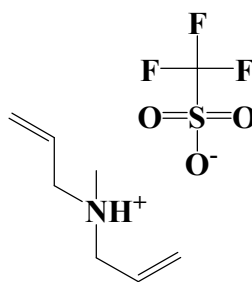

dipropylmethylammonium  
trifluoromethanesulfonate

[N133][TfO]

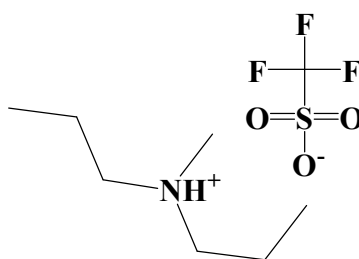

Ethanediamine formic acid

[EDA.HO<sub>2</sub>CH]

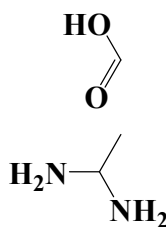

Ethanediamine acetic acid

[EDA.AcOH]

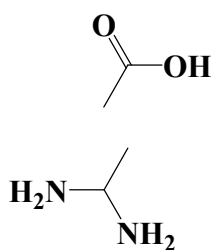

Ethanediamine di-n-butyl phosphate

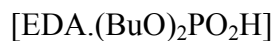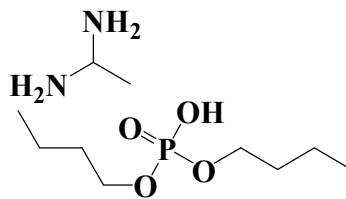

Triethylamine formic acid

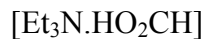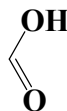

Triethylamine methylsulfonic acid

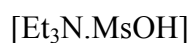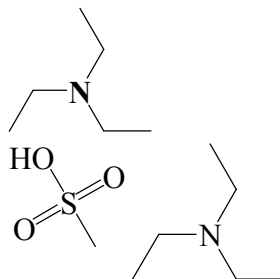

Triethylamine di-n-butyl phosphate

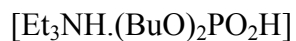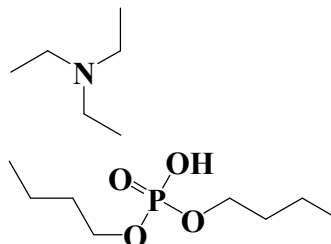

Diethylamine di-n-butyl phosphate

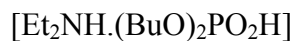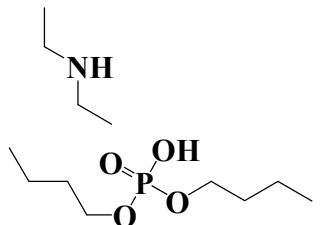

Di-n-Butylamine formic acid

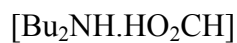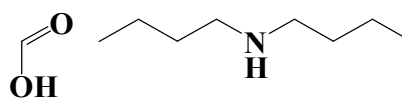

Tri-n-Butylamine di-n-butyl phosphate

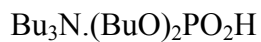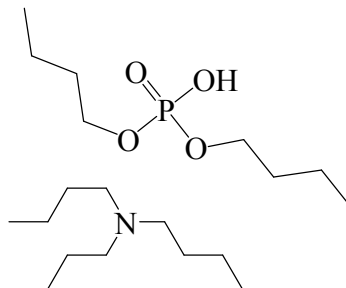

diethanolamine formic acid

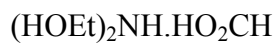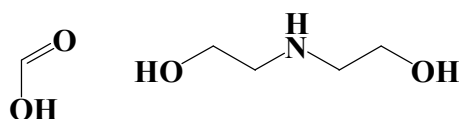

diethanolamine acetic acid  $(\text{HOEt})_2\text{NH}\cdot\text{AcOH}$

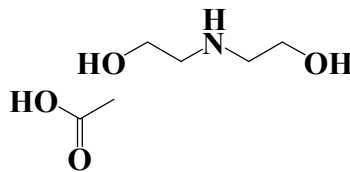

diethanolamine sulfamic acid  $(\text{HOEt})_2\text{NH}\cdot\text{OSA}$

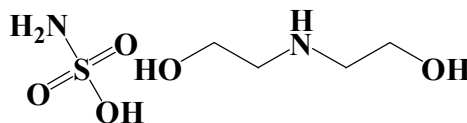

diethanolamine methylsulfonic acid  $(\text{HOEt})_2\text{NH}\cdot\text{MsOH}$

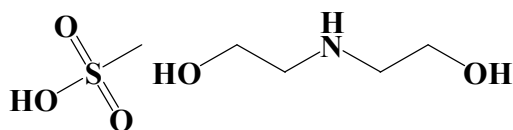

diethanolamine di-n-butyl phosphate  $(\text{HOEt})_2\text{NH}\cdot(\text{BuO})_2\text{P O}_2\text{H}$

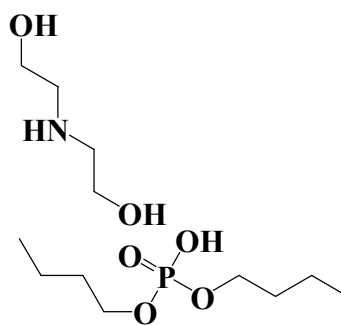

diethanolamine Chlorid  $[\text{DEA}][\text{Cl}]$

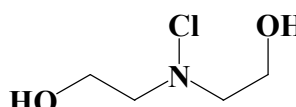

triethanolamine formate  $[\text{TEtA}][\text{Of}]$

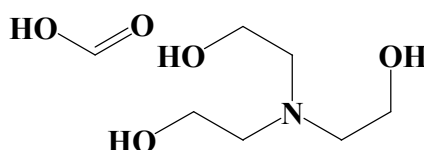

triethanolamine acetate  $[\text{TEtA}][\text{A}]$

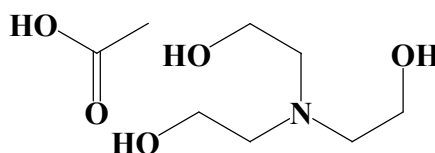

di-n-propylamine formate  $[\text{DPA}][\text{Of}]$

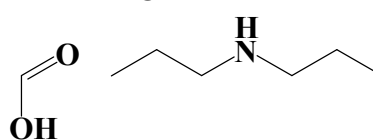

Methyldiethanolamine  $[\text{MDEA}]$

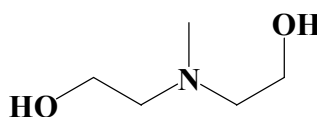

N-butyl-(N-hydroxyethyl) ammonium trifluoroacetate

[BHEA] [TFA]

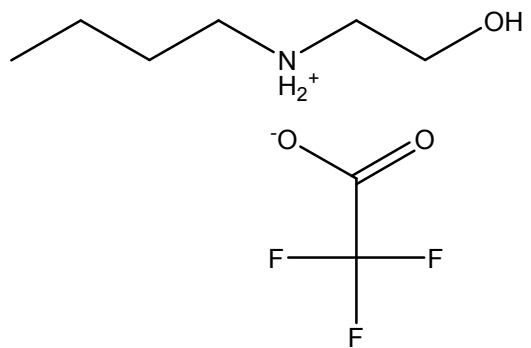

N-butyl-(N-hydroxyethyl) ammonium nitrate

[BHEA] [NO<sub>3</sub>]

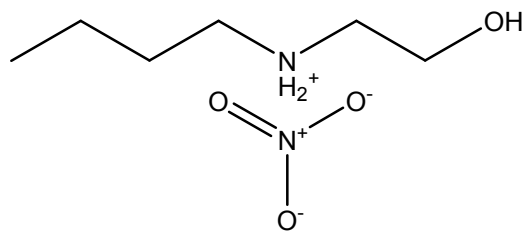

N-methylcyclohexyl ammonium pentanoate

[NMC][Pen]

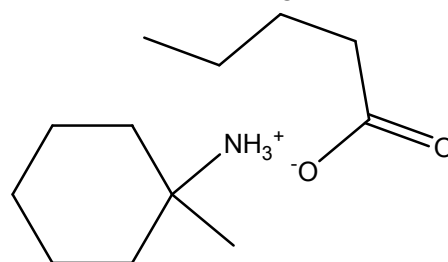

N-methylcyclohexyl ammonium hexanoate

[NMC][Hex]

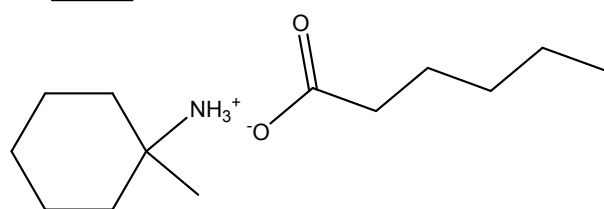

N-methylcyclohexyl ammonium heptanoate

[NMC][Hep]

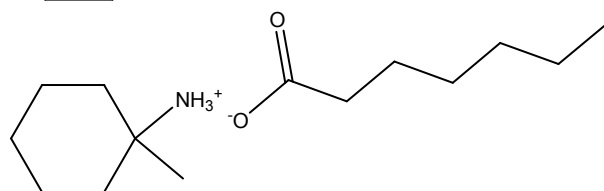

N-methylcyclohexyl ammonium octanoate

[NMC][Oct]

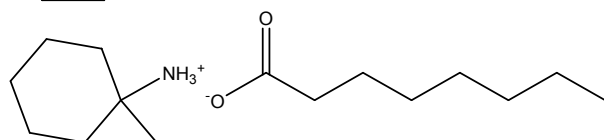

N-ethyl-N,N-dimethyl ammoniumphenylacetate

[N<sub>112H</sub>][C<sub>7</sub>H<sub>7</sub>CO<sub>2</sub>]

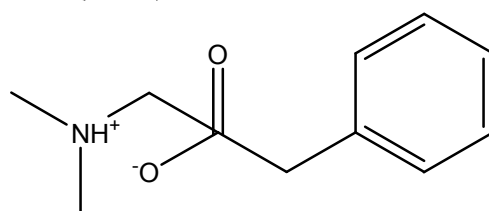

Supplement: c6cp00199h1.pdf [file c6cp00199h1.pdf]
